# Supplementary material for: High-Resolution SNP/CGH Microarrays Reveal the Accumulation of Loss of Heterozygosity in Commonly Used Candida albicans Strains
Source: PubMed Central journal article supplement (PMC3276171; doi:10.1534/g3.111.000885), 2011-12-01
Supplement: supp_1.7.523_000885SI.pdf [file supp_1.7.523_000885SI.pdf]

A

P1 (YJB9407)

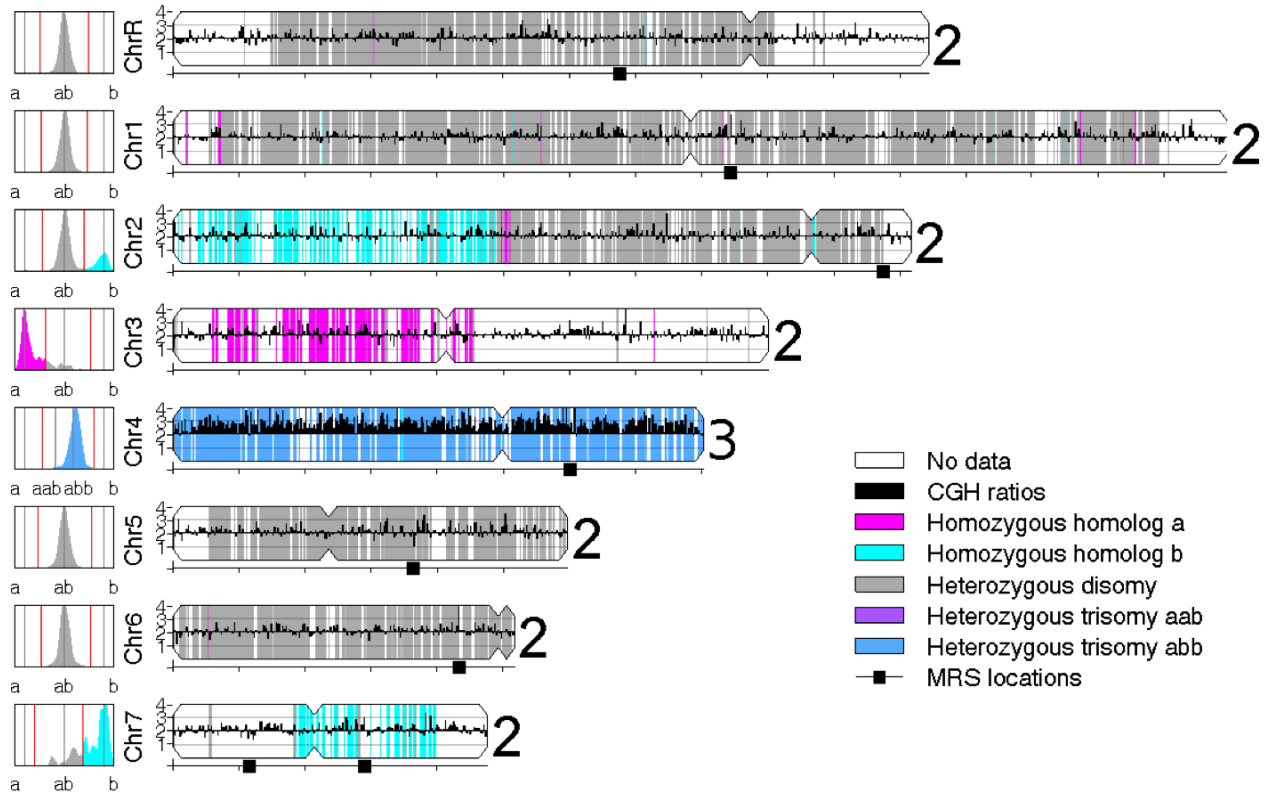

B

P2 (YJB9408)

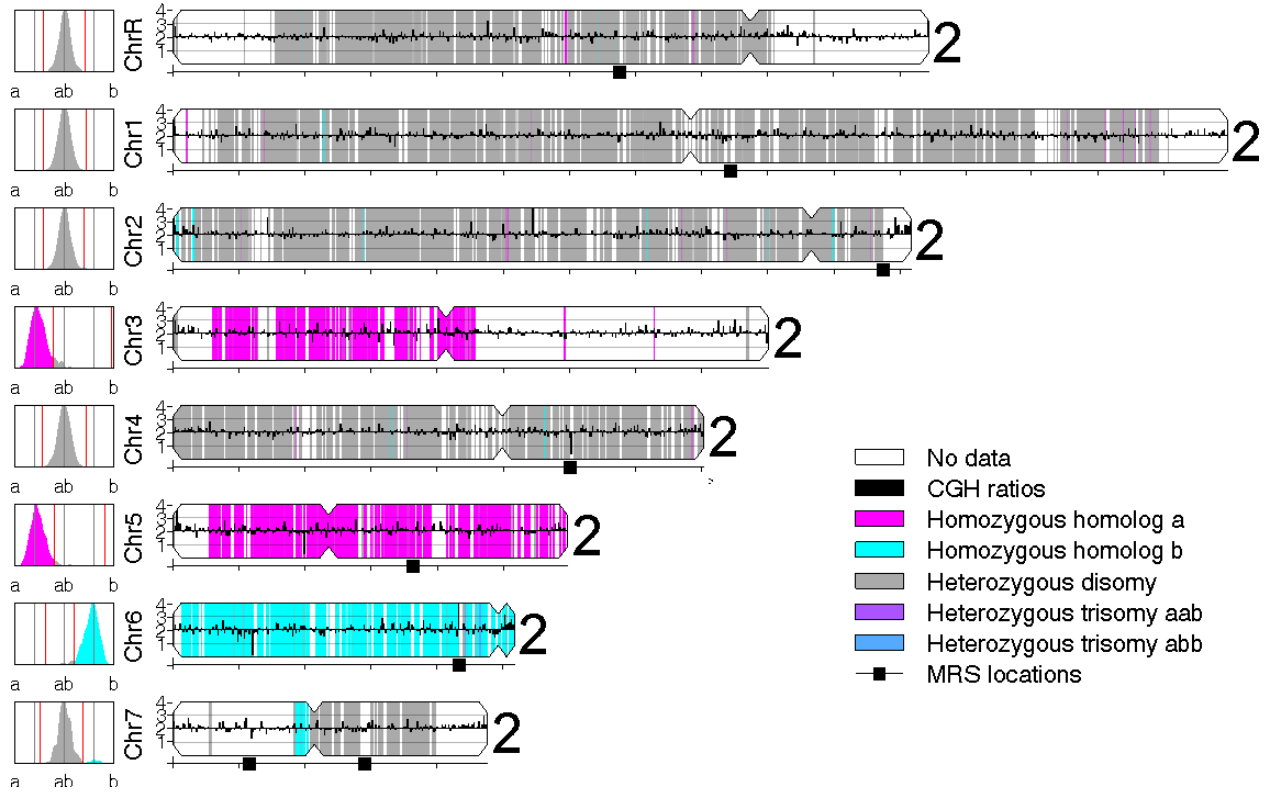

c

Ps7 (YJB10019)

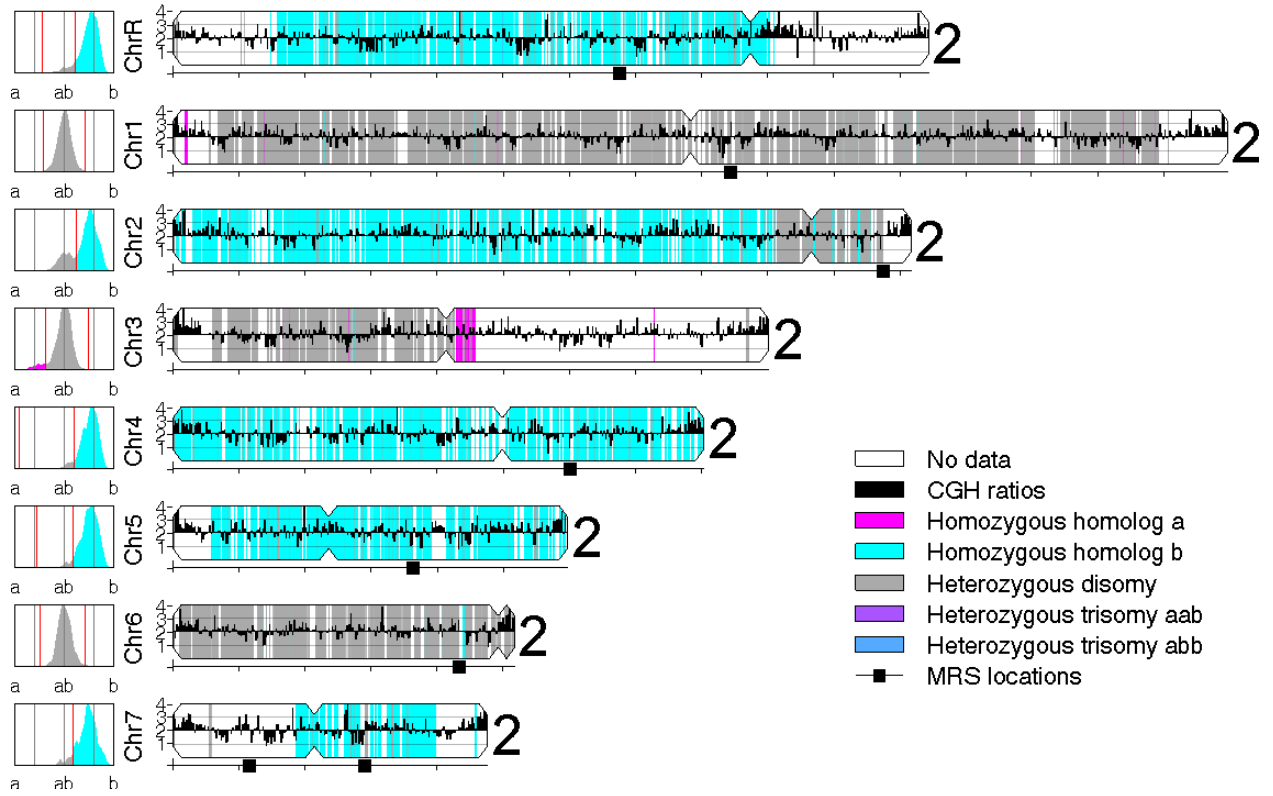

D

Ps8 (YJB10020)

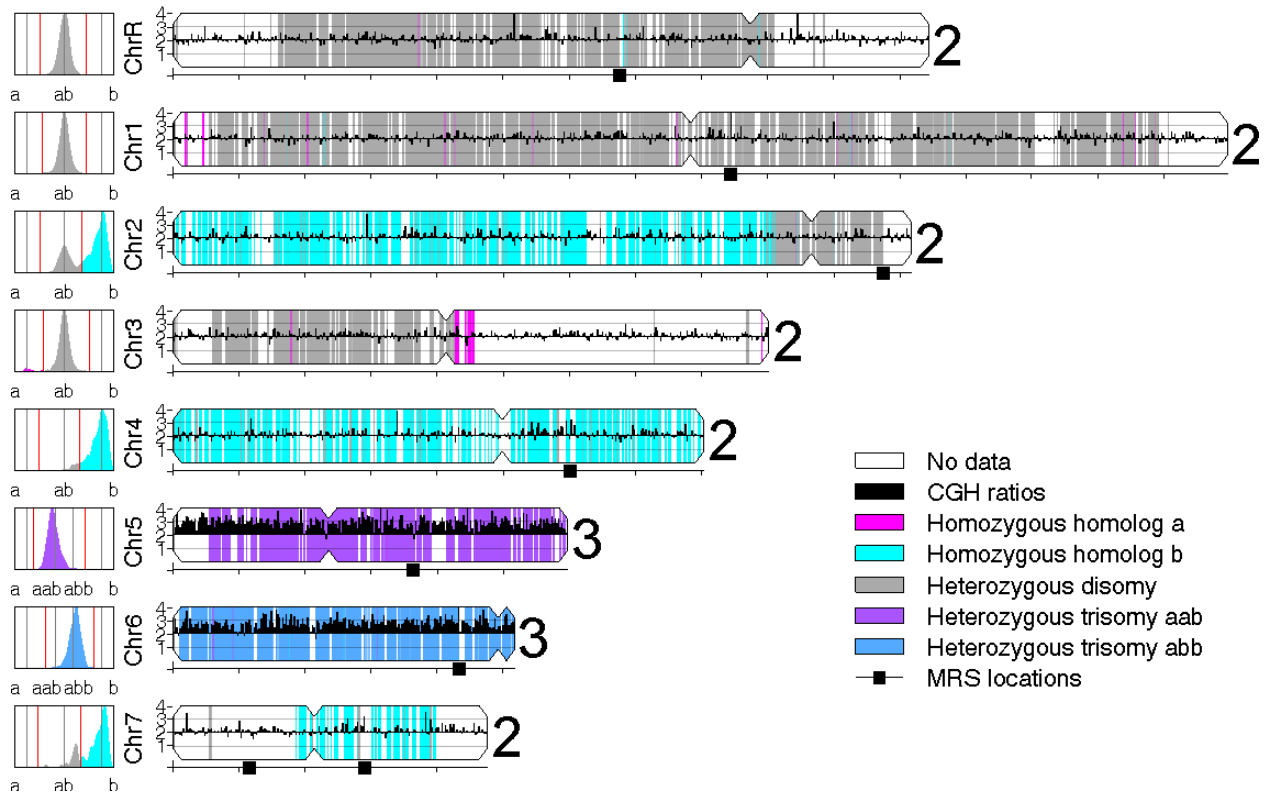

E

### S3 (YJB9416)

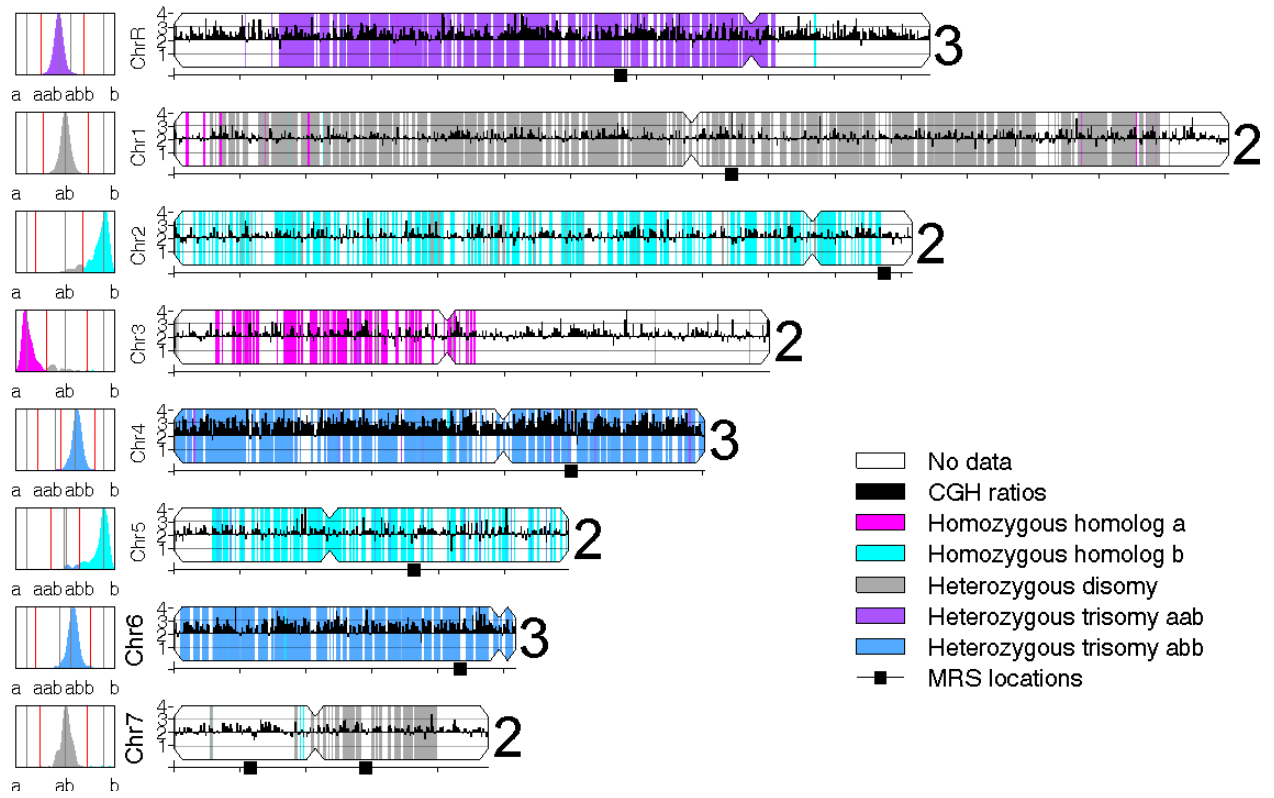

F

S4 (YJB9417)

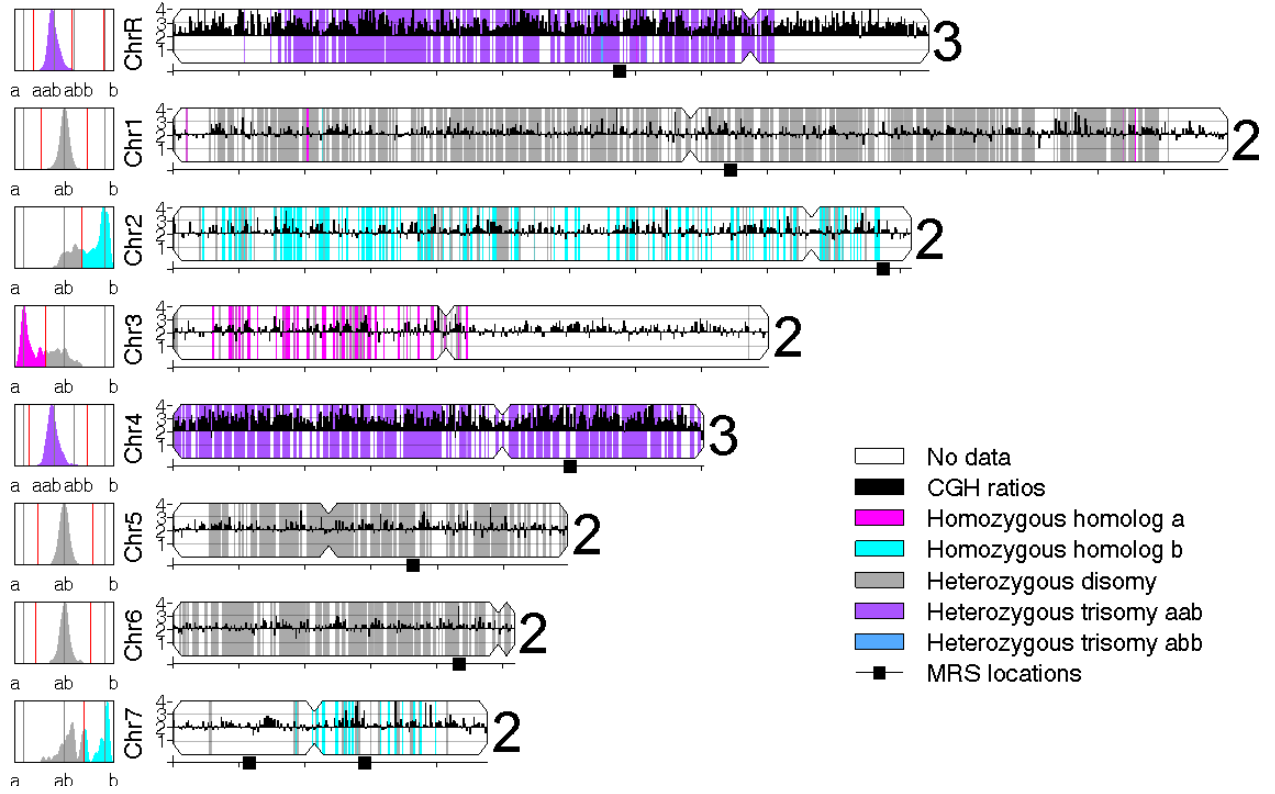

G

Ss2 (YJB10022) [small colony]

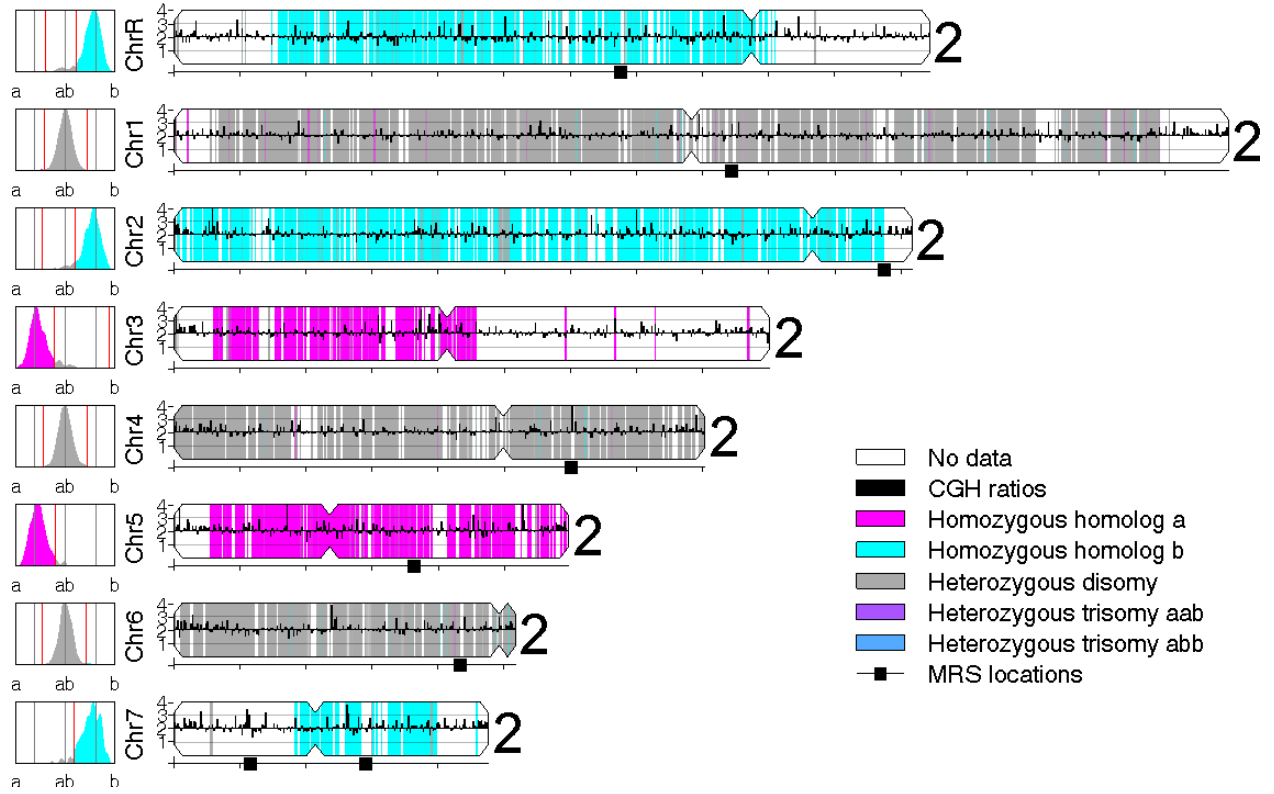

H

Ss2 (YJB10022) [large colony]

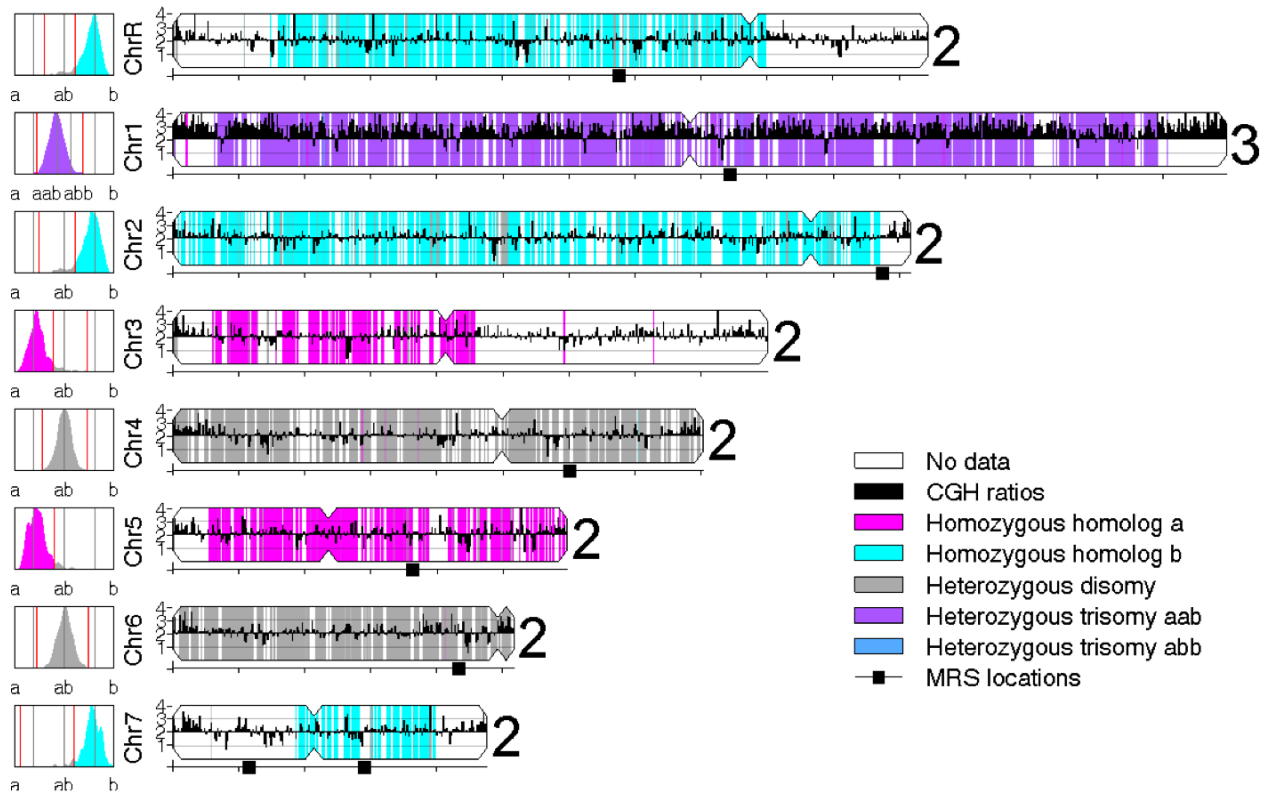

**Figure S1** SNP/CGH of parasexual progeny strains used to construct the *C. albicans* SC5314 hapmap. Data for each strain was analyzed by SNP/CGH array and visualized as illustrated in Fig. 3. A) Strain P1 (YJB9407); B) P2 (YJB9408). C) Ps7 (YJB10019). D) Ps8 (YJB10020). E) S3 (YJB9416). F) S4 (YJB9417). G) Ss2 (YJB10022), small colony. H) Ss2 (YJB10022), large colony.



A

### CAF2 (YJB2101)

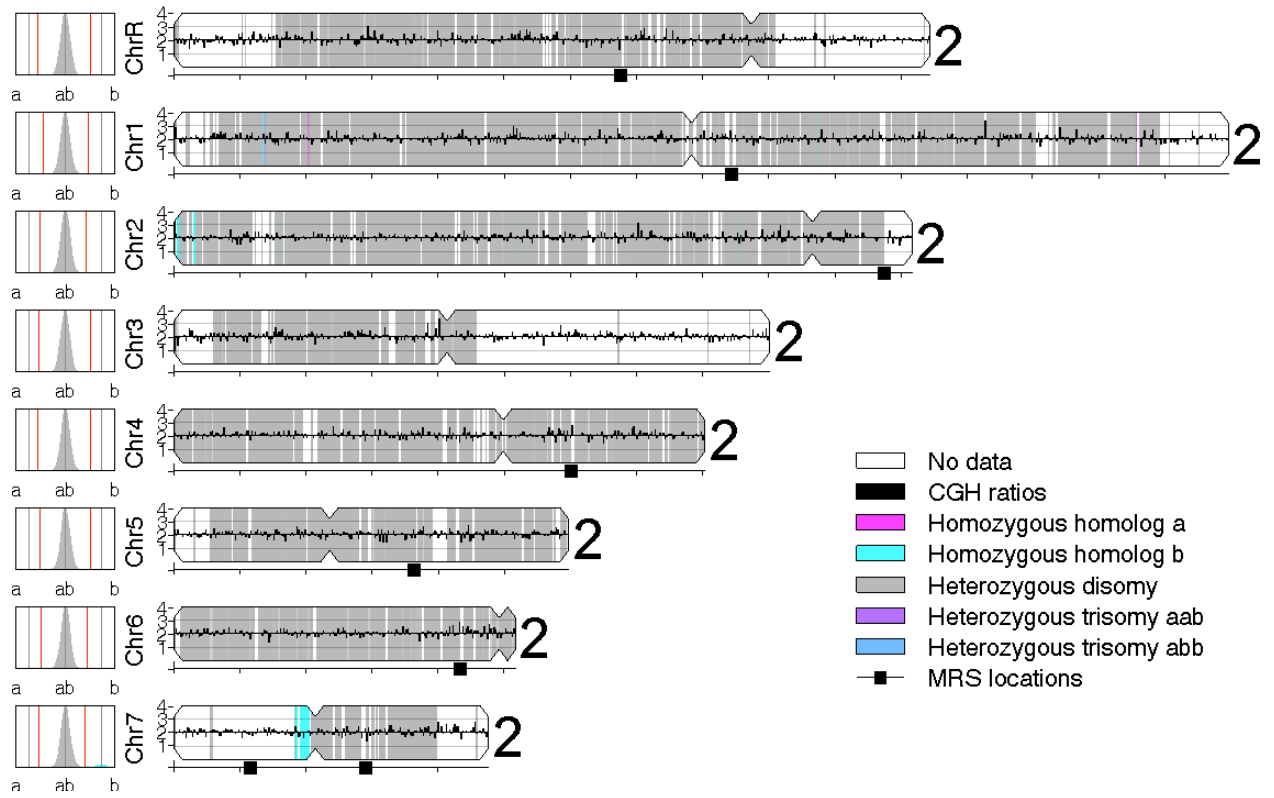

B

RM10 (YJB8648)

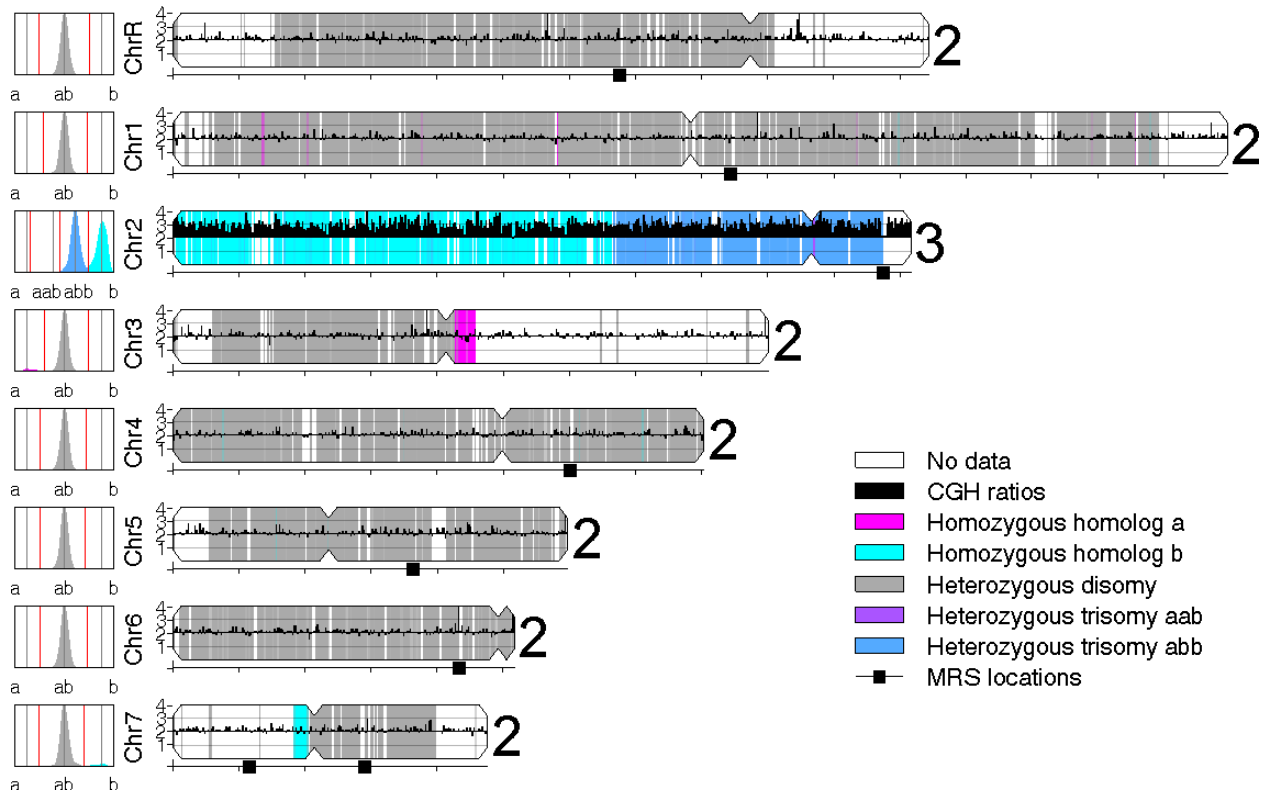

c

RM100 #13 (YJB8661)

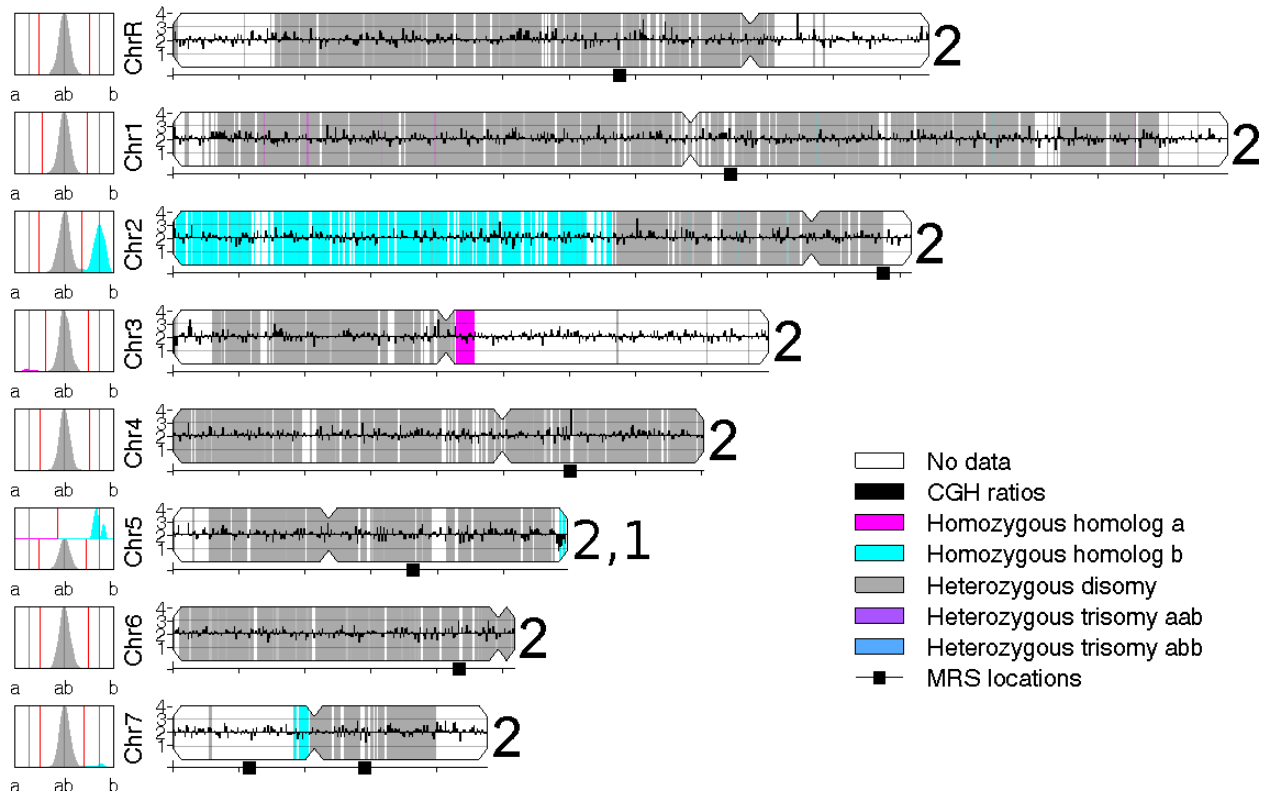

D

RM1000 #2 (YJB7617)

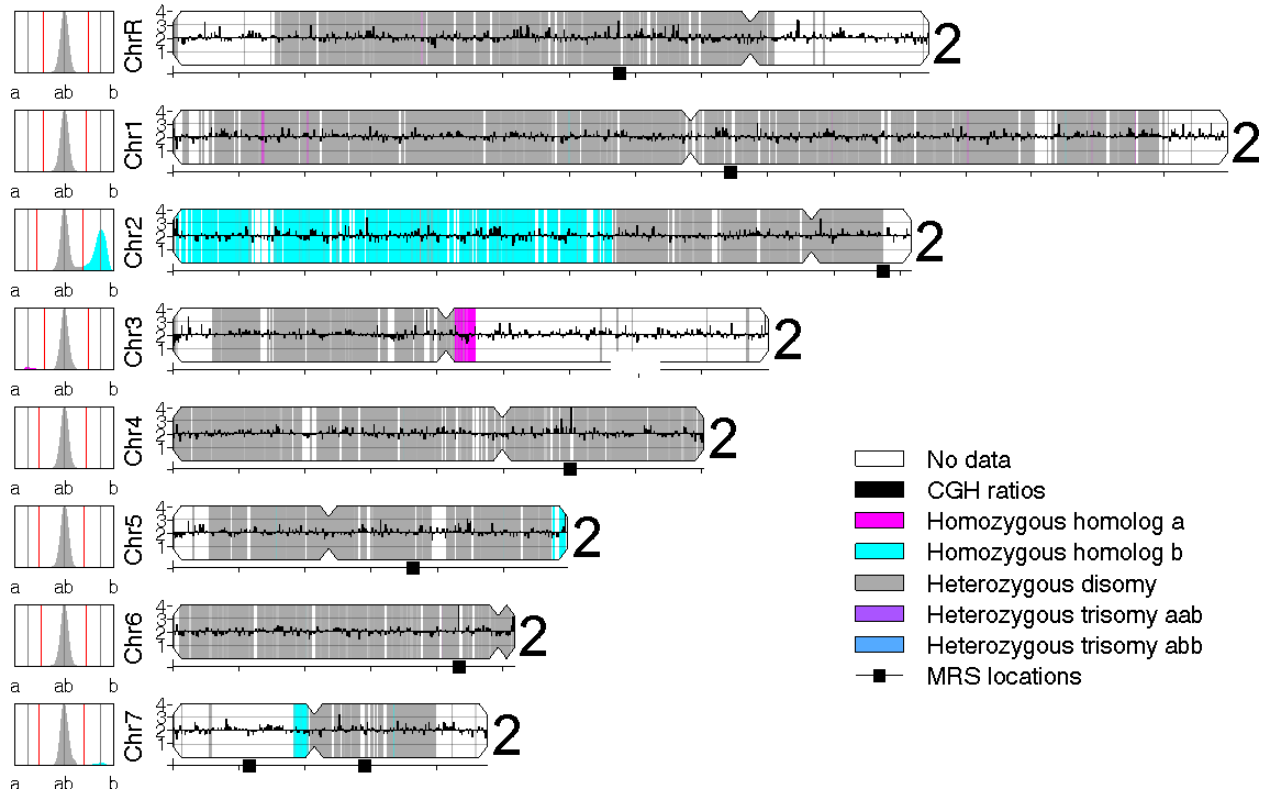

E

RM1000 #6 (YJB7616)

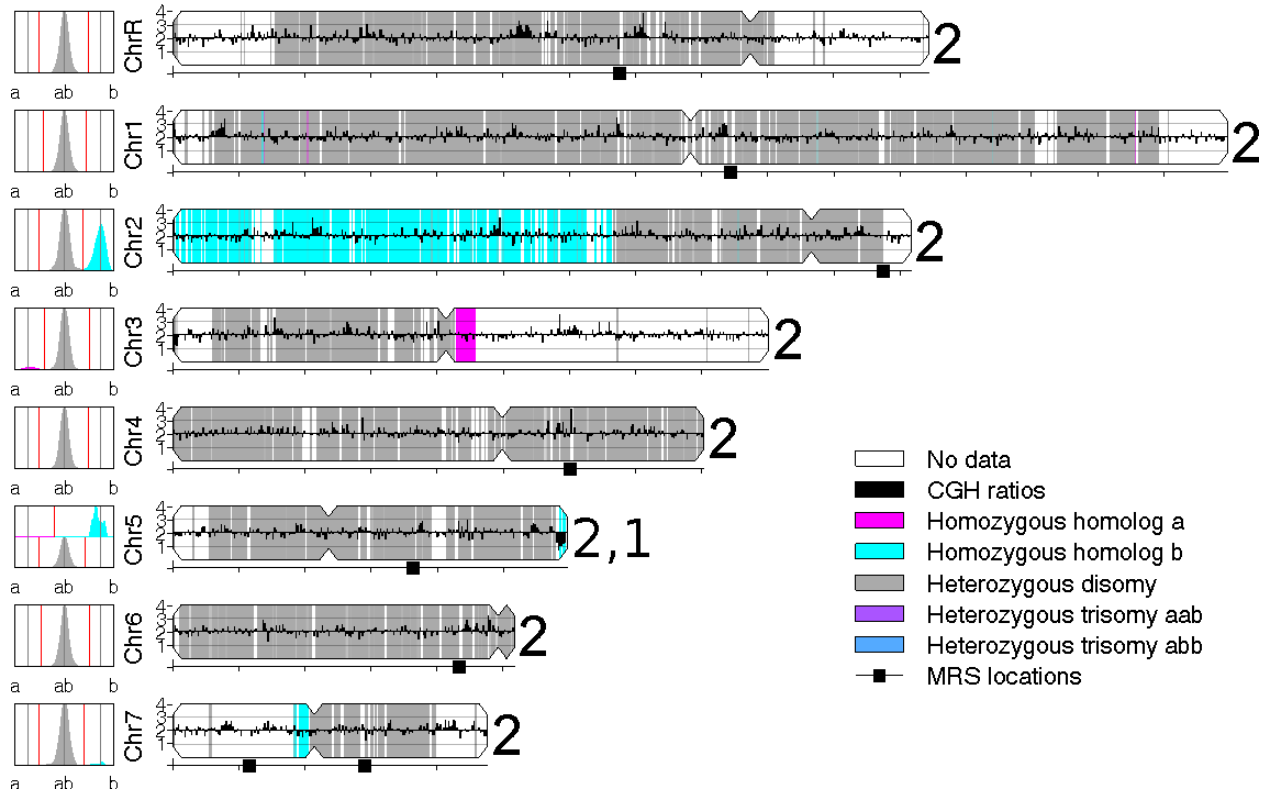

F

SN76 (YJB10038)

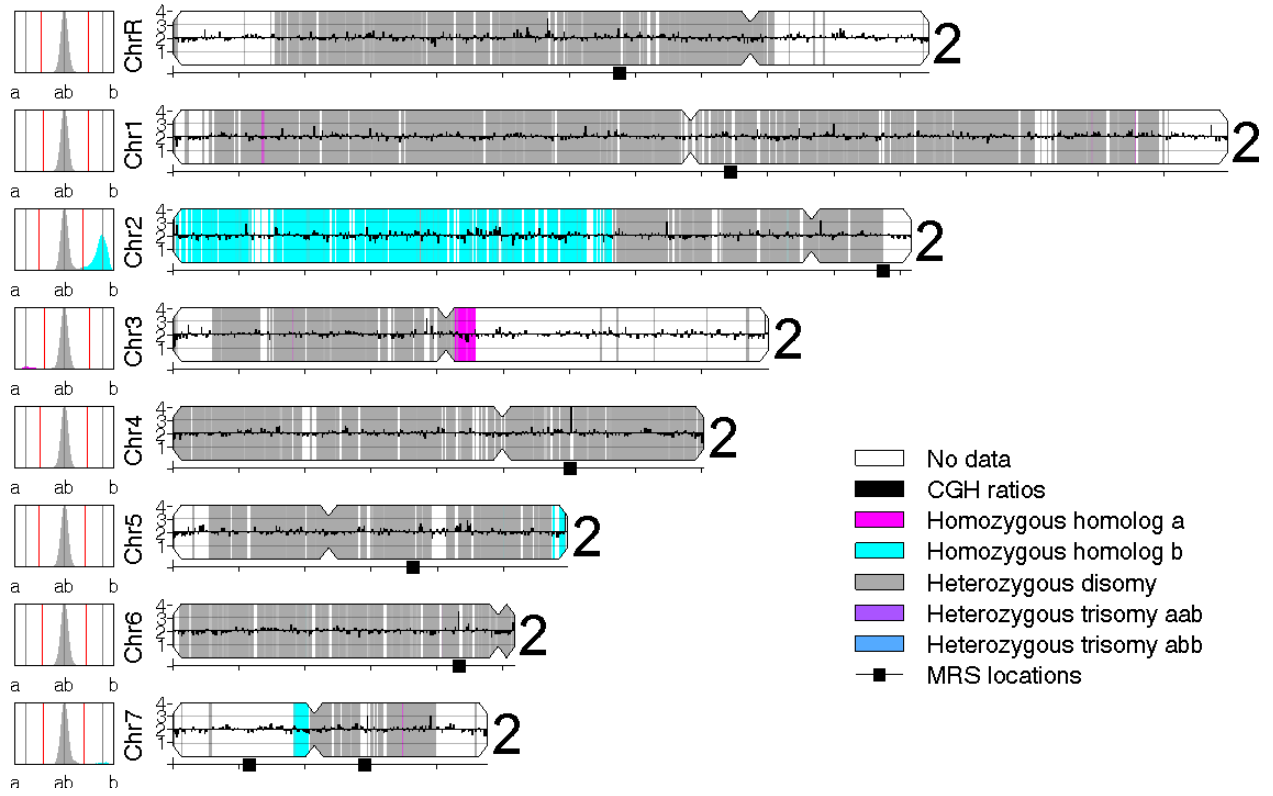

G

BWP17 (YJB3731)

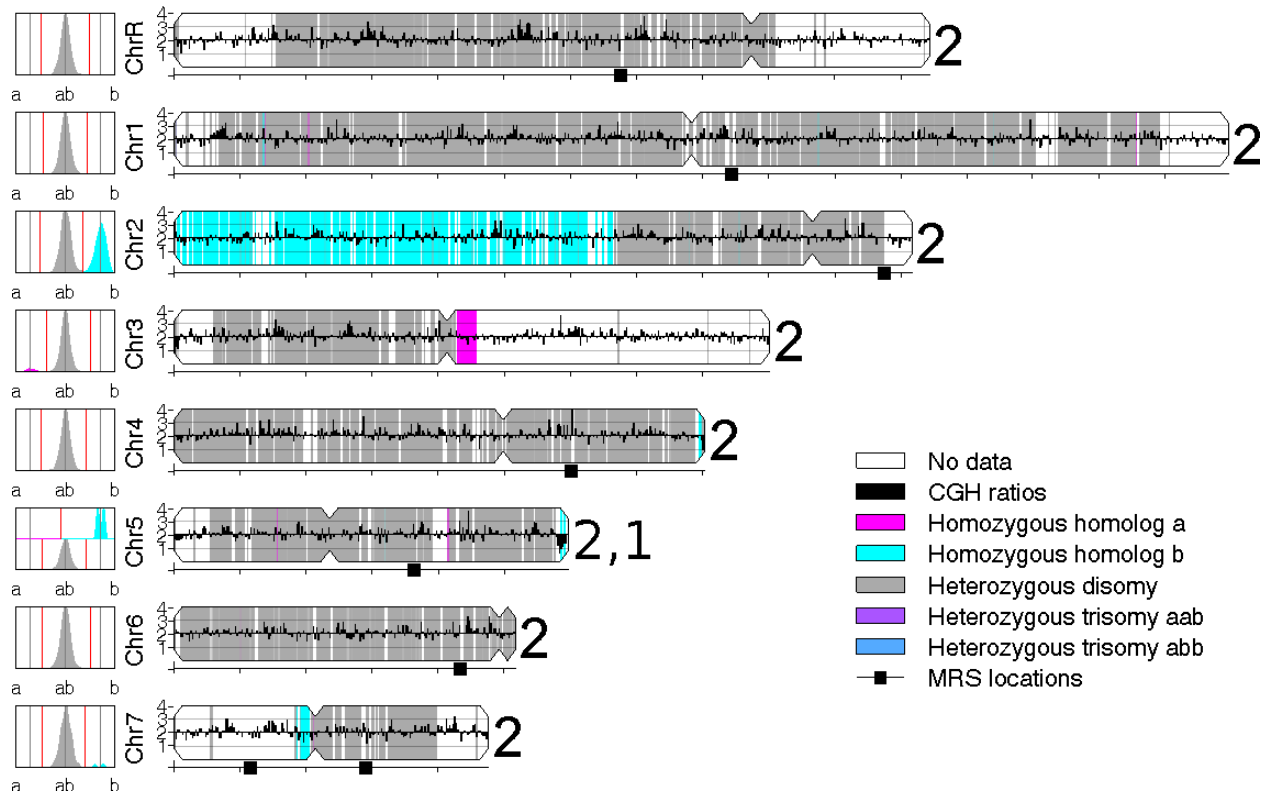

**Figure S2** SNP/CGH figures of related laboratory strains derived from SC5314. Data for each strain was analyzed by SNP/CGH array and visualized as illustrated in Fig. 3. A) CAF2 (YJB2101). B) RM10 (YJB8648). C) RM100 #13 (YJB8661). D) RM1000 #2 (YJB7617). E) RM1000 #6 (YJB7616). F) SN76 (YJB10038). G) BWP17 (YJB3731).

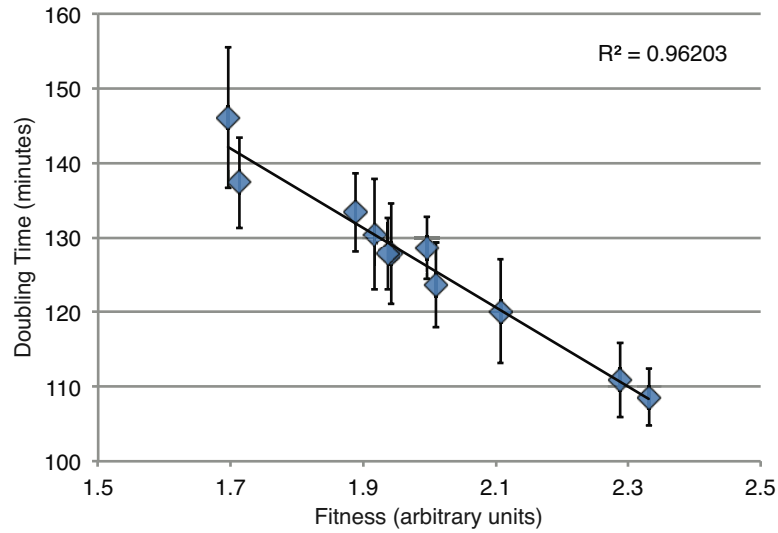

**Figure S3** Doubling time correlates with strain fitness. Plot of all 10 strains analyzed in Fig. 4 for fitness (X-axis) calculated as described (ADDINALL *et al.* 2011) vs doubling time (Y-axis). The strong linearity indicates doubling time is the major contributor to fitness in this set of strains and growth conditions.

ADDINALL, S. G., E. M. HOLSTEIN, C. LAWLESS, M. YU, K. CHAPMAN *et al.*, 2011 Quantitative Fitness Analysis Shows That NMD Proteins and Many Other Protein Complexes Suppress or Enhance Distinct Telomere Cap Defects. *PLoS Genet* **7**: e1001362.



### Tables S1-S3

Tables S1-S3 are available for download at <http://www.g3journal.org/lookup/suppl/doi:10.1534/g3.111.000885/-/DC1> as excel files.

**Table S1:** Strains used in this study

**Table S2:** Informative SNPs in the complete Hapmap

**Table S3:** SNPs on the array that were not informative
