# Supplementary material for: High-Resolution SNP/CGH Microarrays Reveal the Accumulation of Loss of Heterozygosity in Commonly Used Candida albicans Strains
Source: PubMed Central journal article supplement (PMC3276171; doi:10.1534/g3.111.000885), 2011-12-01
Supplement: supp_1.7.523_FigureS1.pdf [file supp_1.7.523_FigureS1.pdf]

A

P1 (YJB9407)

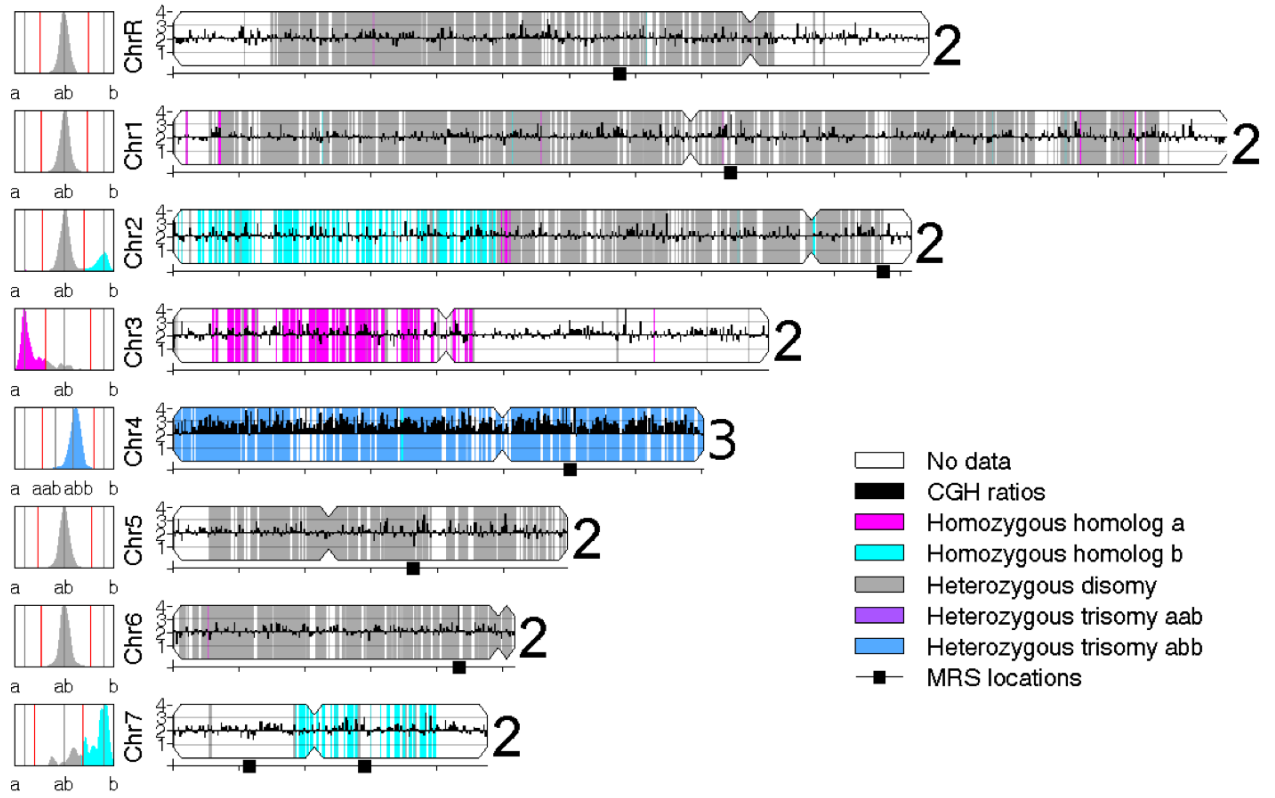

B

P2 (YJB9408)

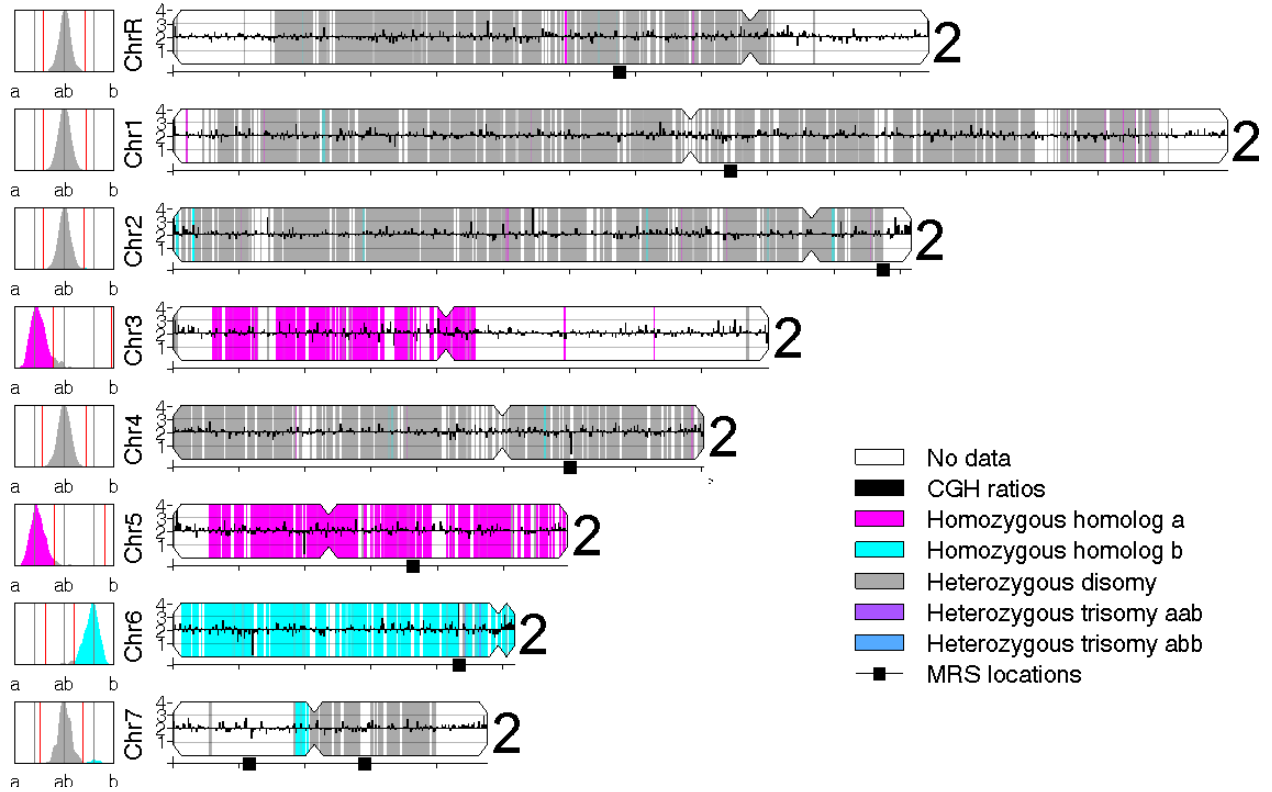

c

Ps7 (YJB10019)

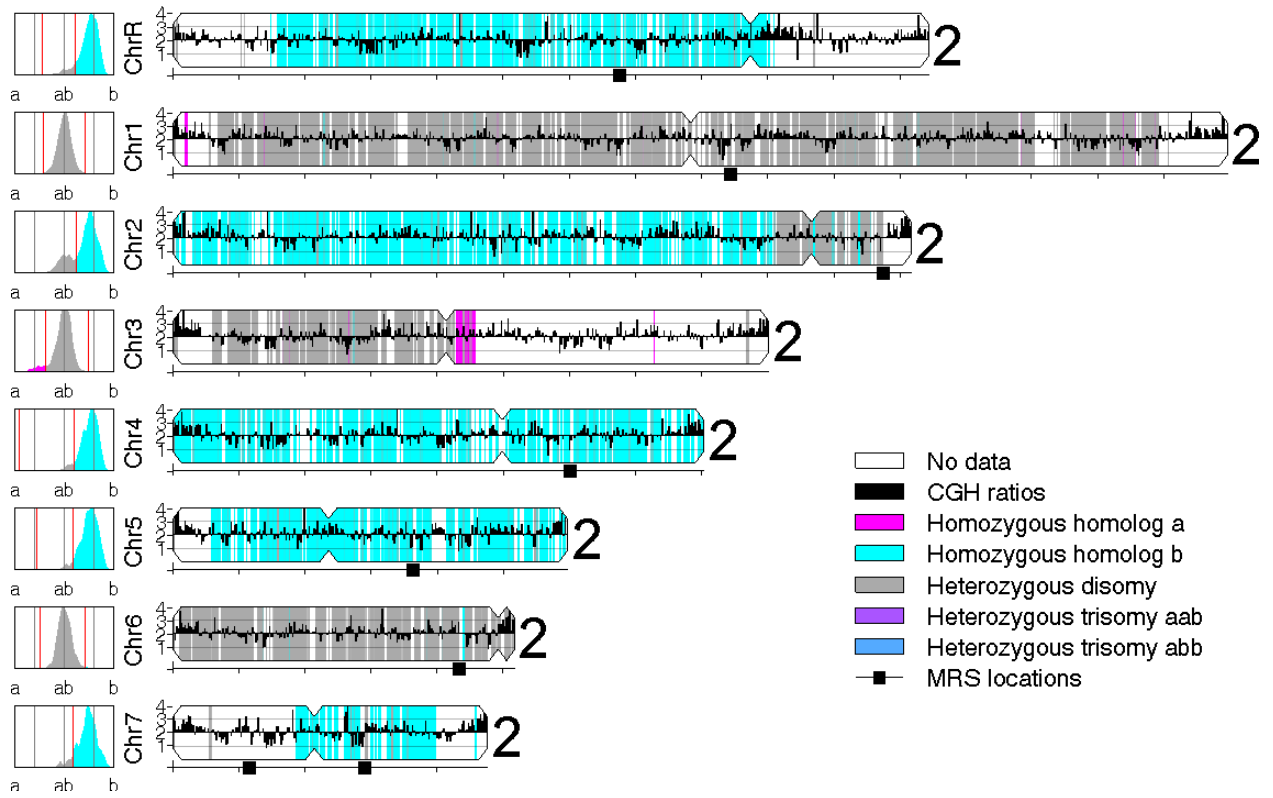

D

Ps8 (YJB10020)

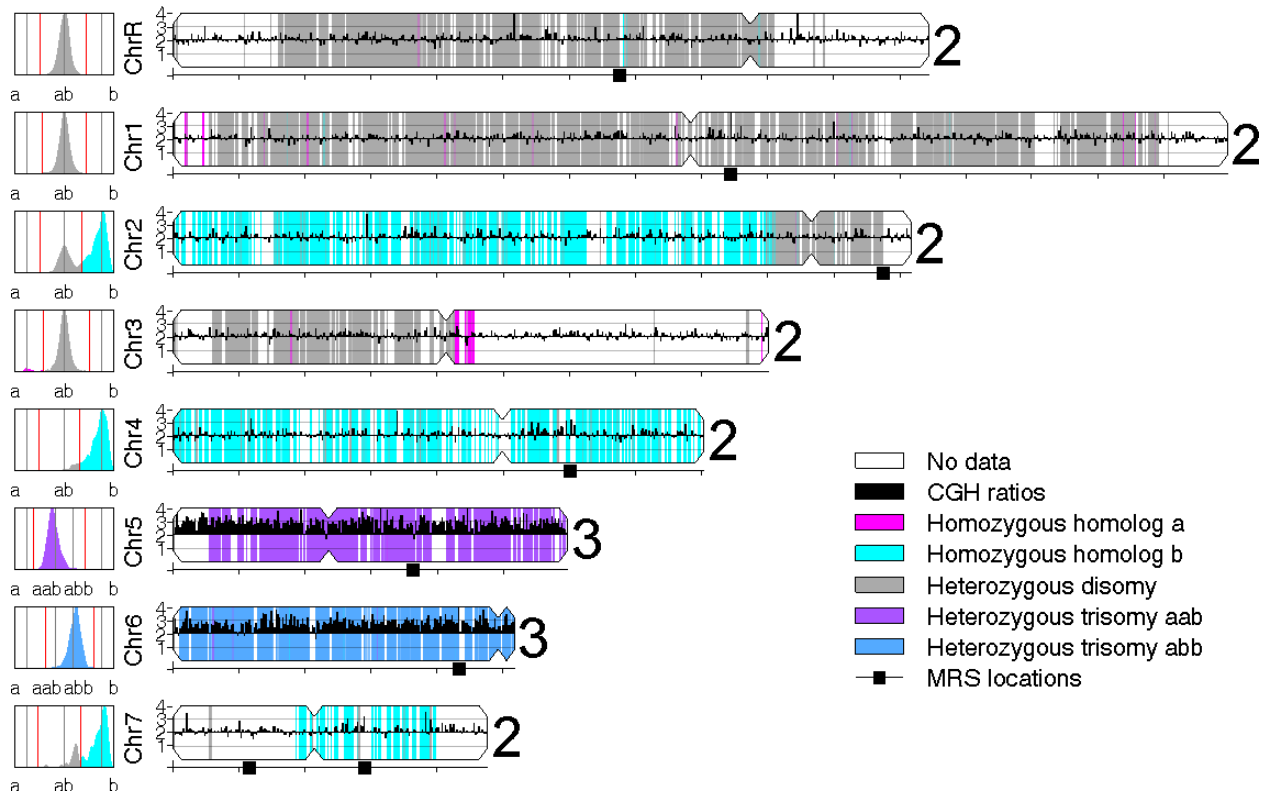

E

### S3 (YJB9416)

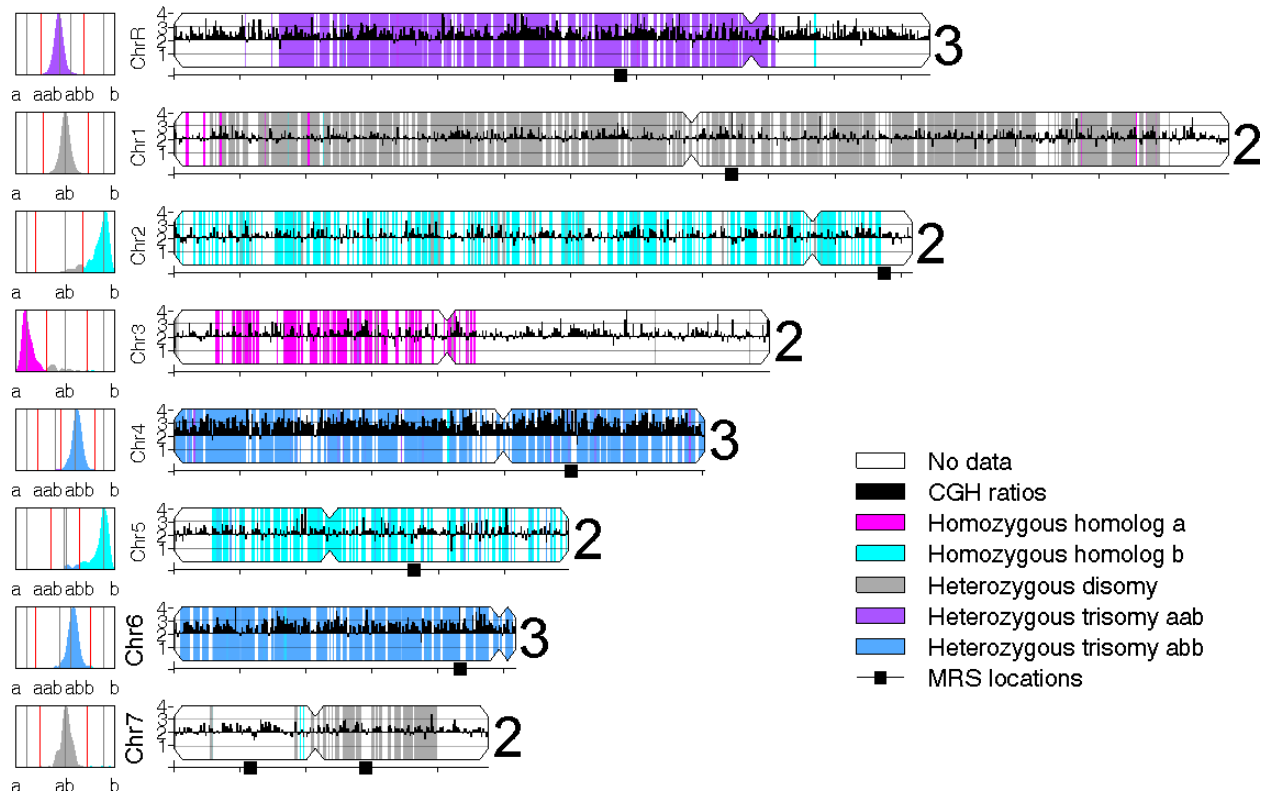

F

S4 (YJB9417)

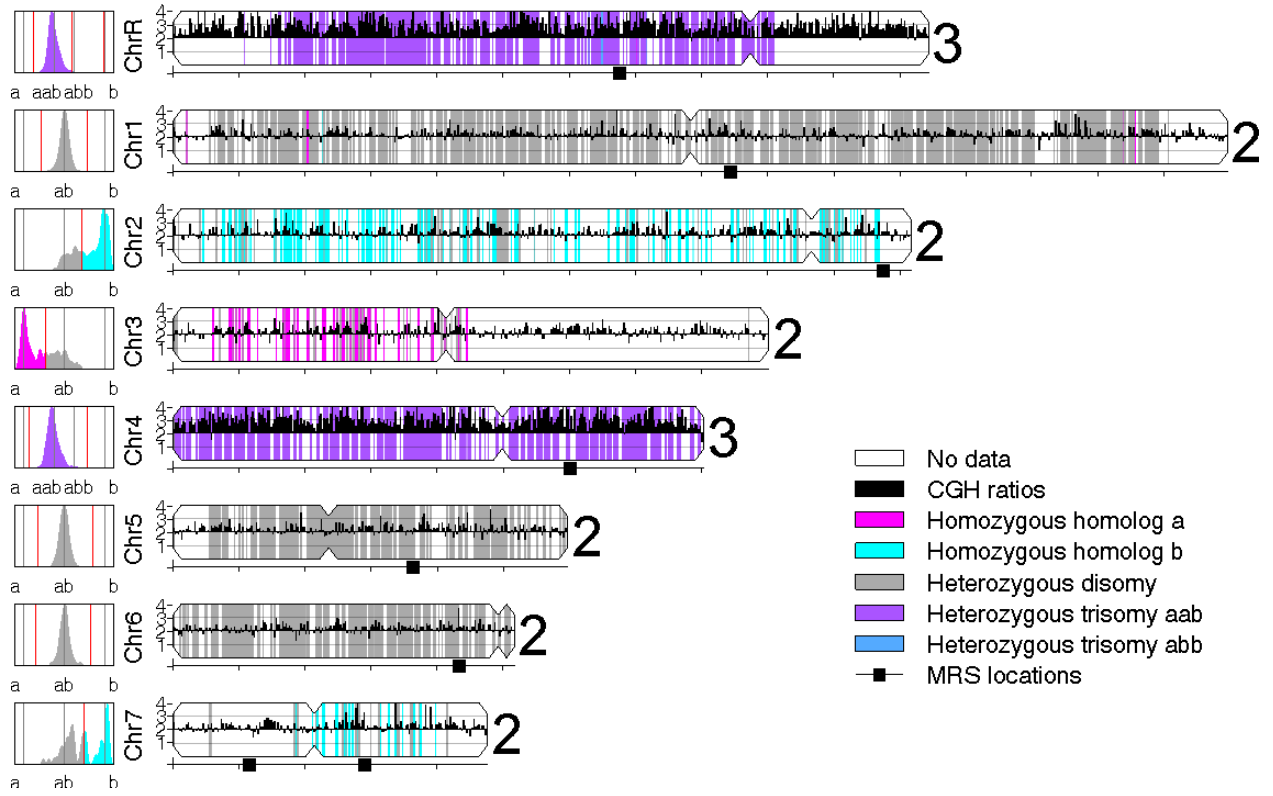

G

Ss2 (YJB10022) [small colony]

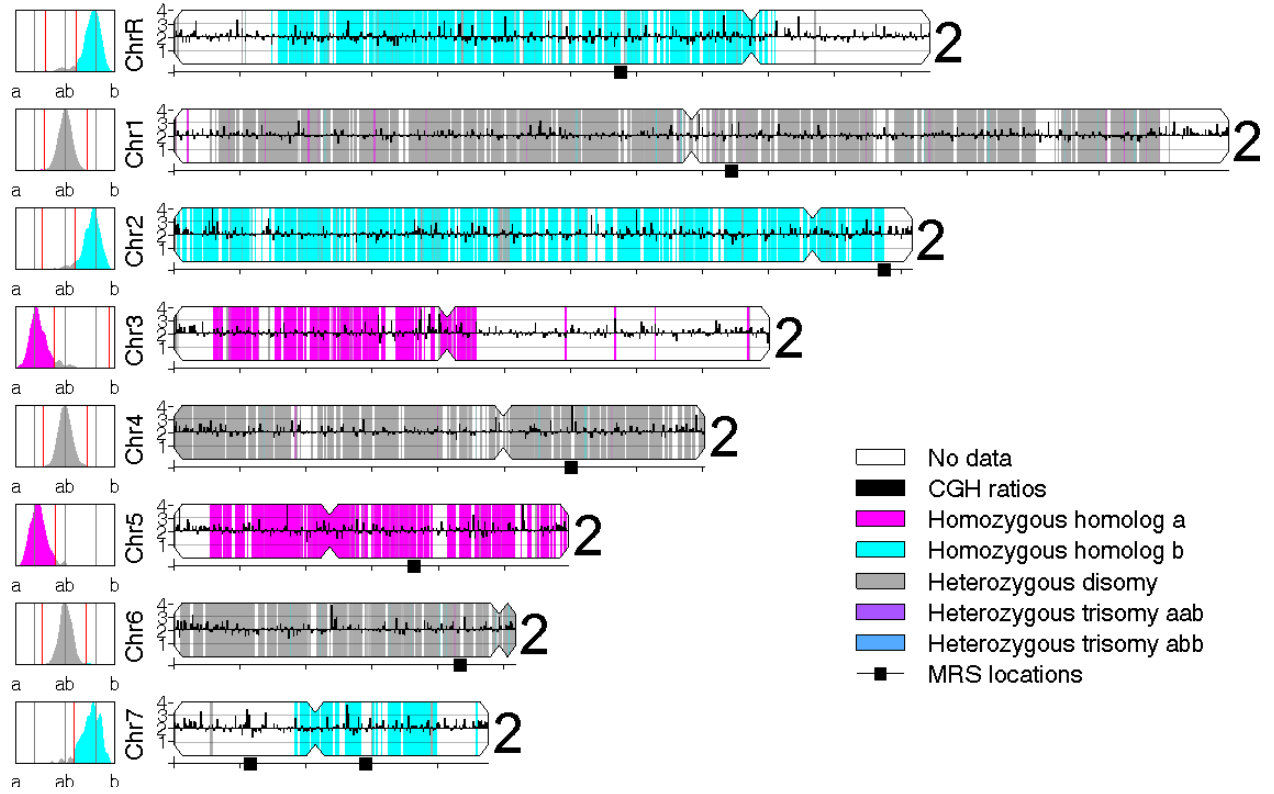

H

Ss2 (YJB10022) [large colony]

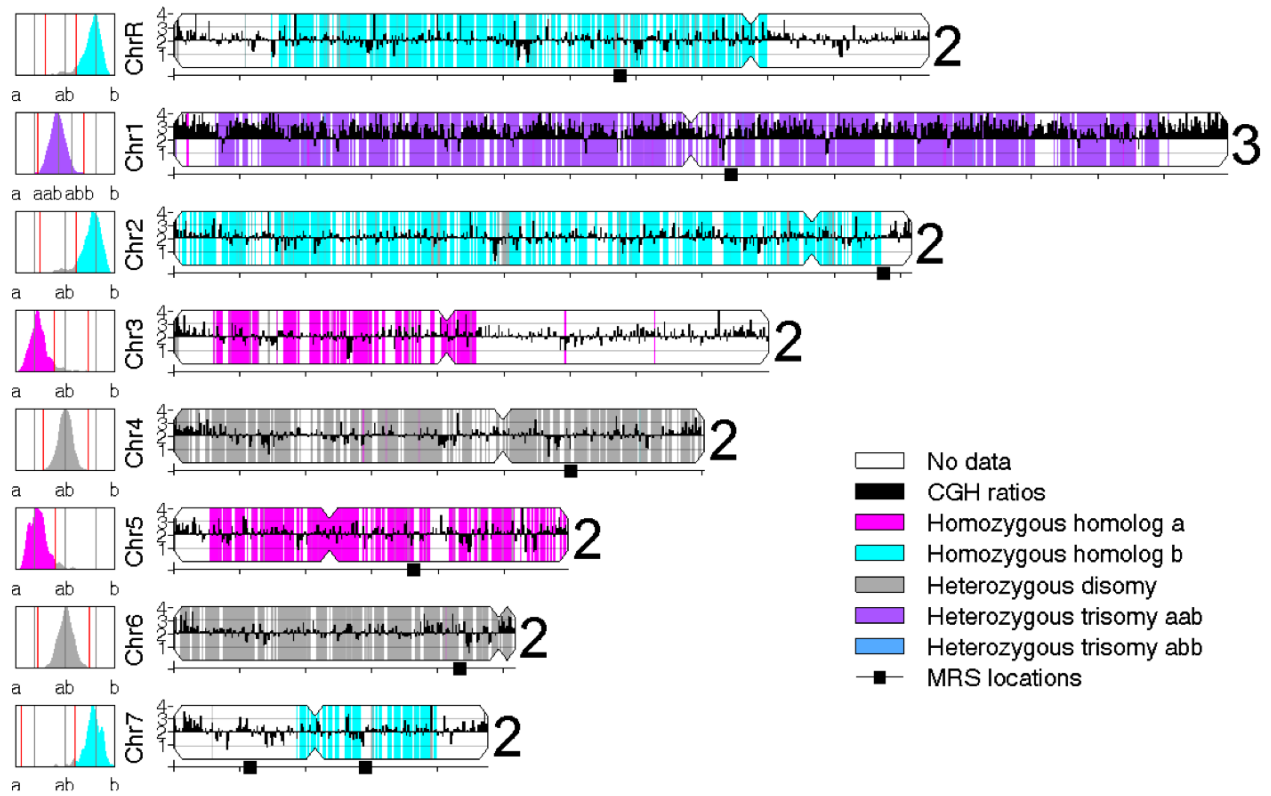

**Figure S1** SNP/CGH of parasexual progeny strains used to construct the *C. albicans* SC5314 hapmap. Data for each strain was analyzed by SNP/CGH array and visualized as illustrated in Fig. 3. A) Strain P1 (YJB9407); B) P2 (YJB9408). C) Ps7 (YJB10019). D) Ps8 (YJB10020). E) S3 (YJB9416). F) S4 (YJB9417). G) Ss2 (YJB10022), small colony. H) Ss2 (YJB10022), large colony.
