# Supplementary material for: High-Resolution SNP/CGH Microarrays Reveal the Accumulation of Loss of Heterozygosity in Commonly Used Candida albicans Strains
Source: PubMed Central journal article supplement (PMC3276171; doi:10.1534/g3.111.000885), 2011-12-01
Supplement: supp_1.7.523_FigureS2.pdf [file supp_1.7.523_FigureS2.pdf]

A

### CAF2 (YJB2101)

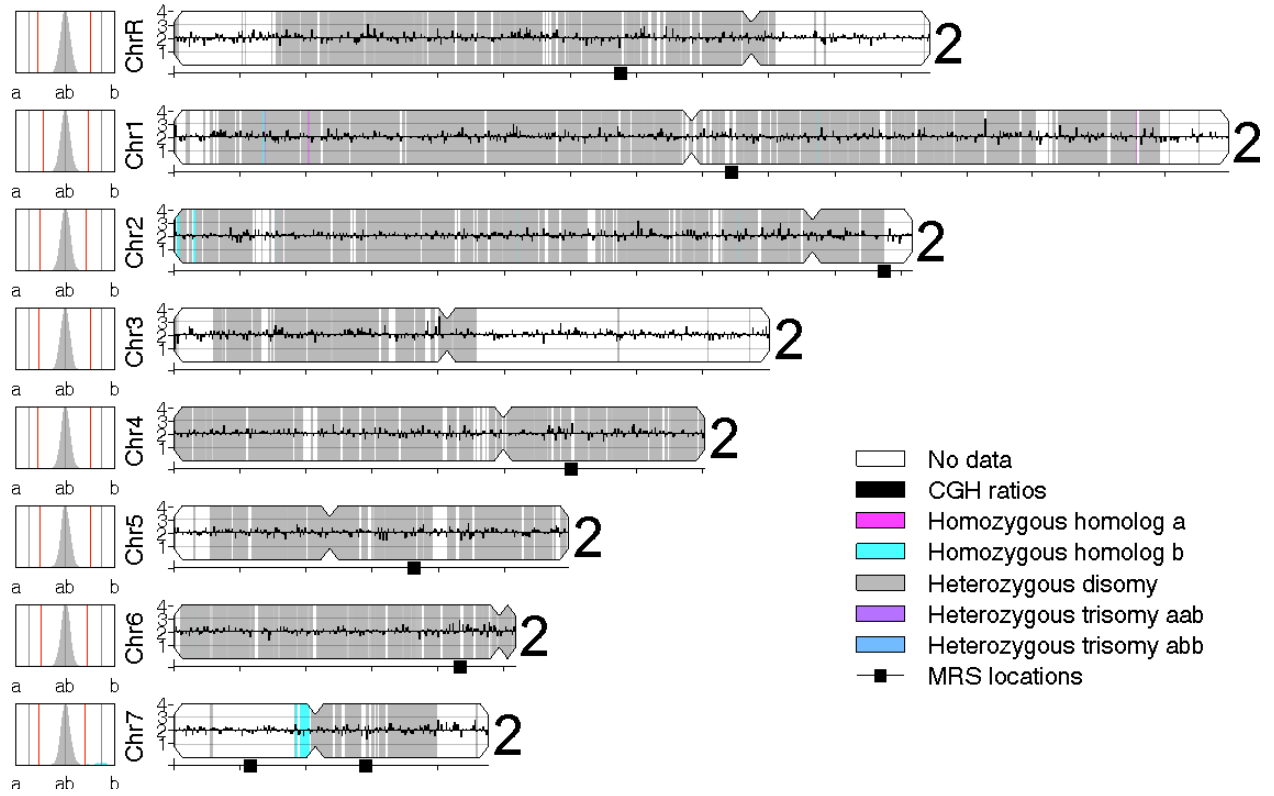

B

RM10 (YJB8648)

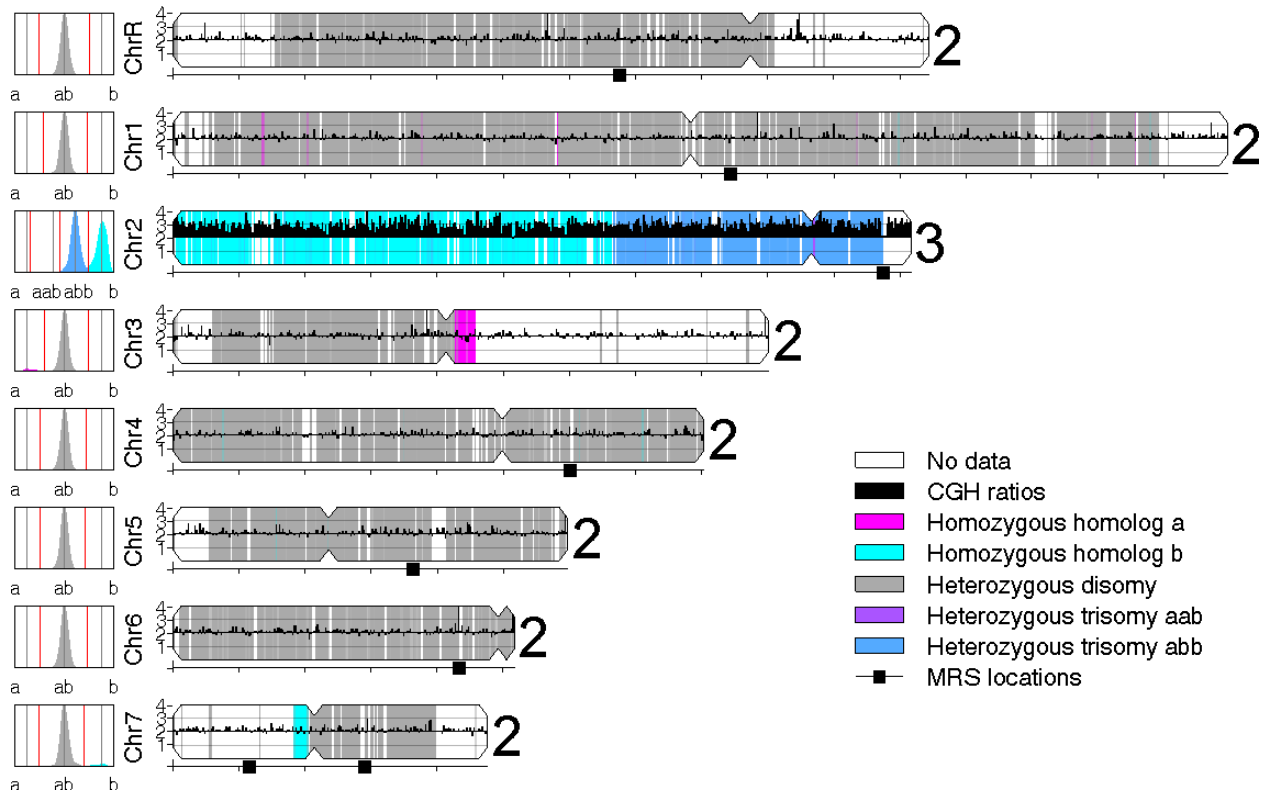

c

RM100 #13 (YJB8661)

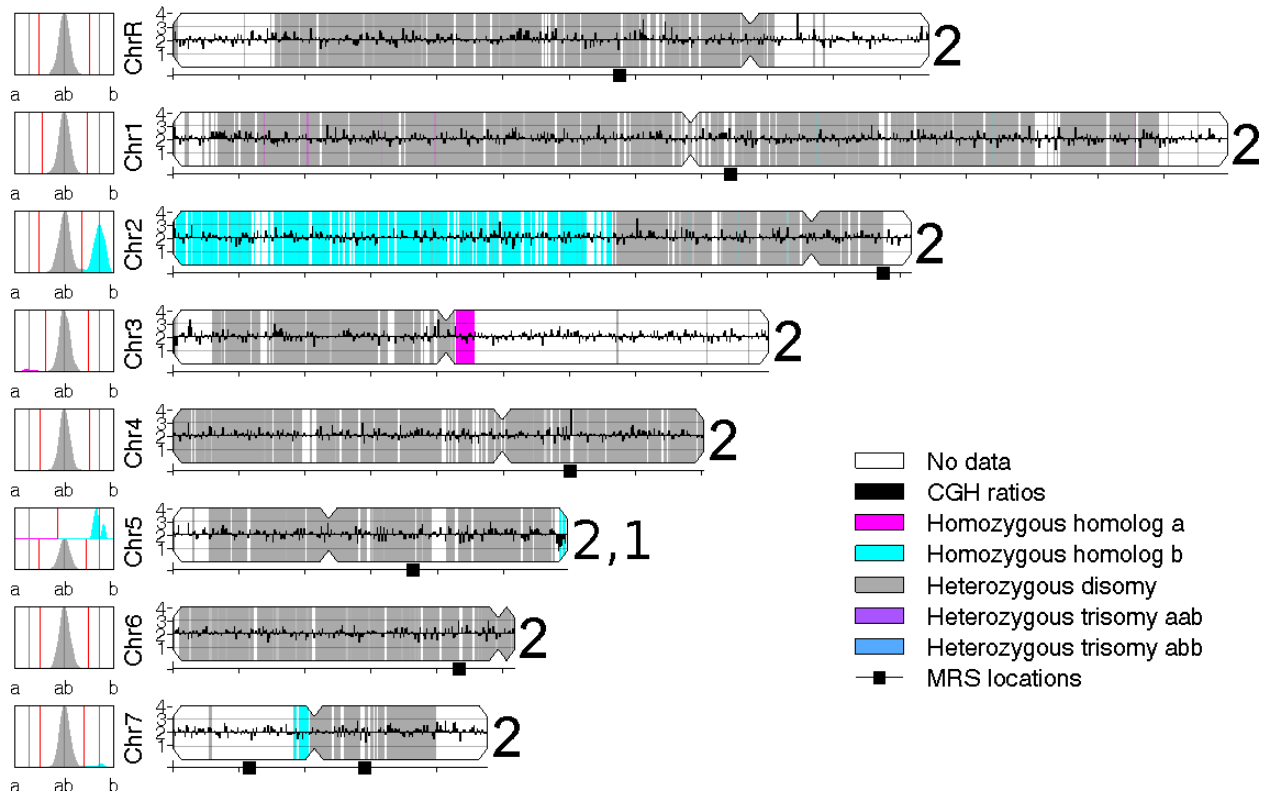

D

RM1000 #2 (YJB7617)

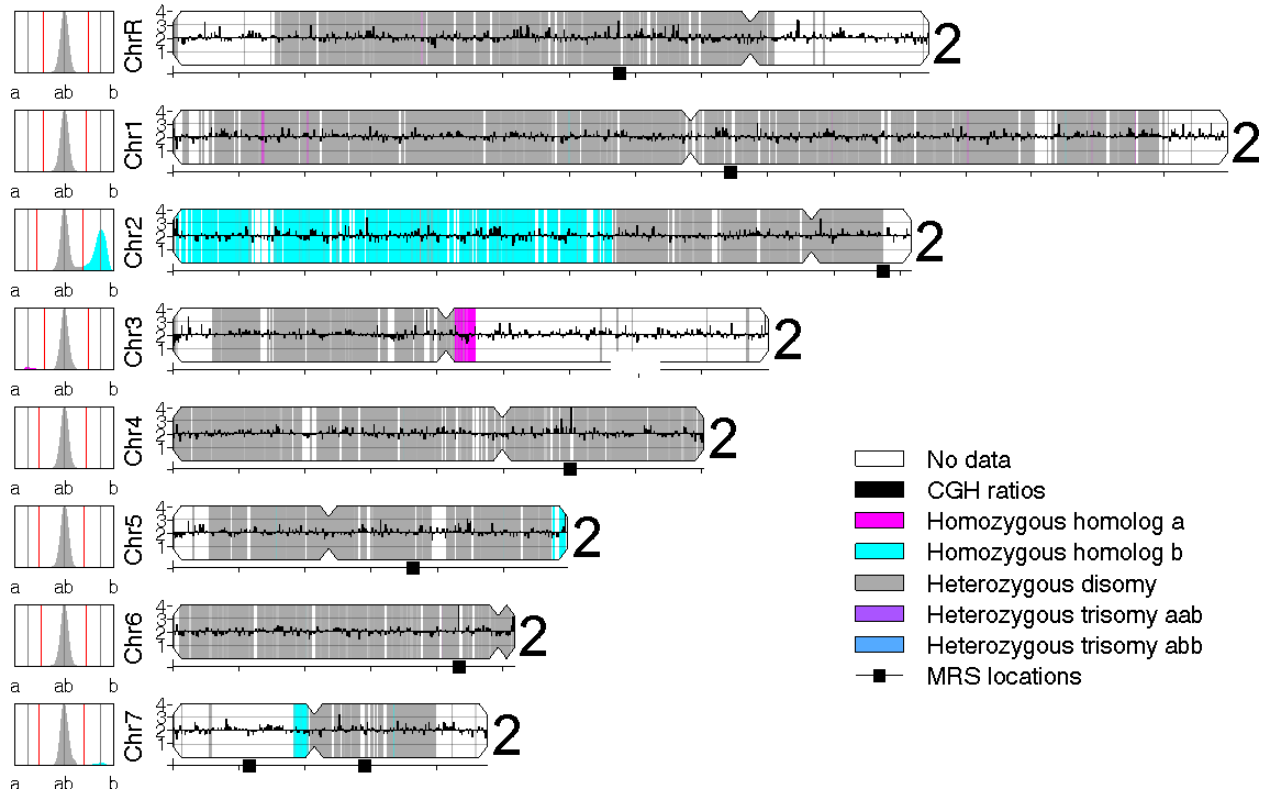

E

RM1000 #6 (YJB7616)

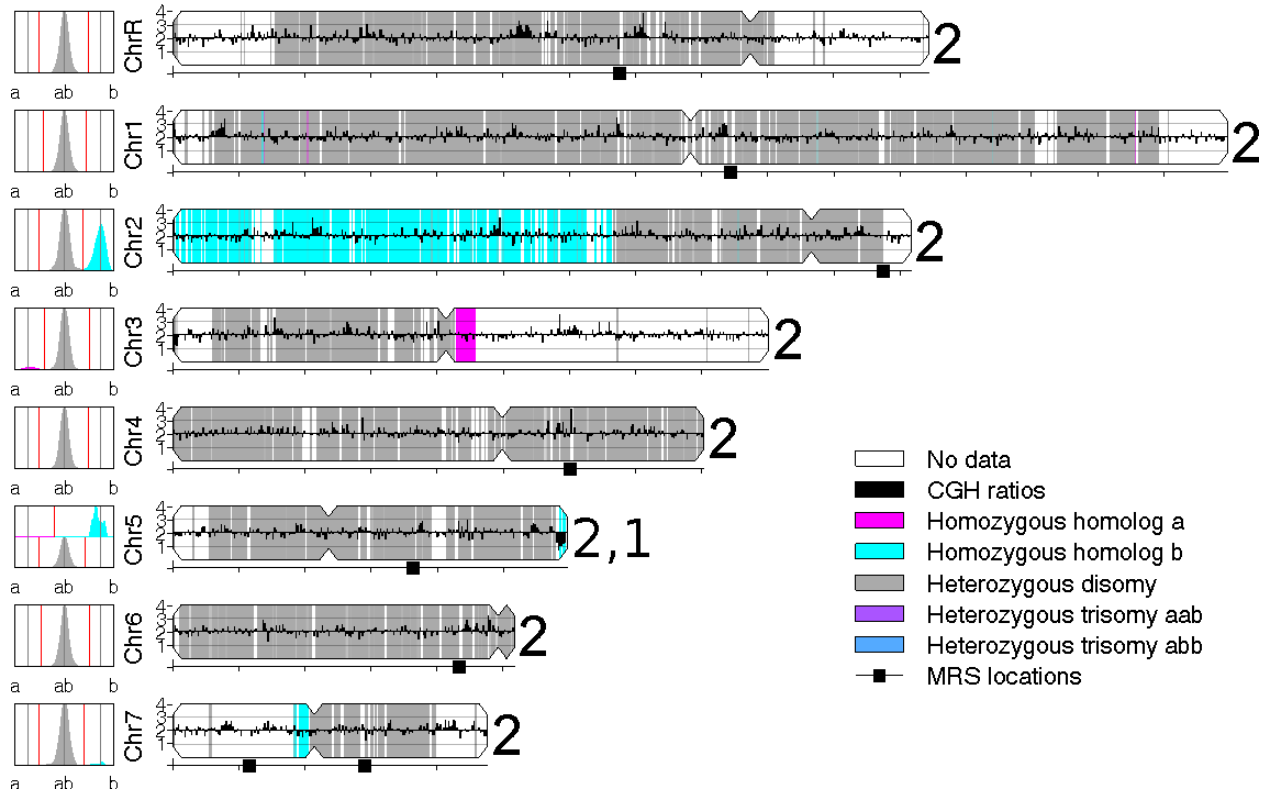

F

SN76 (YJB10038)

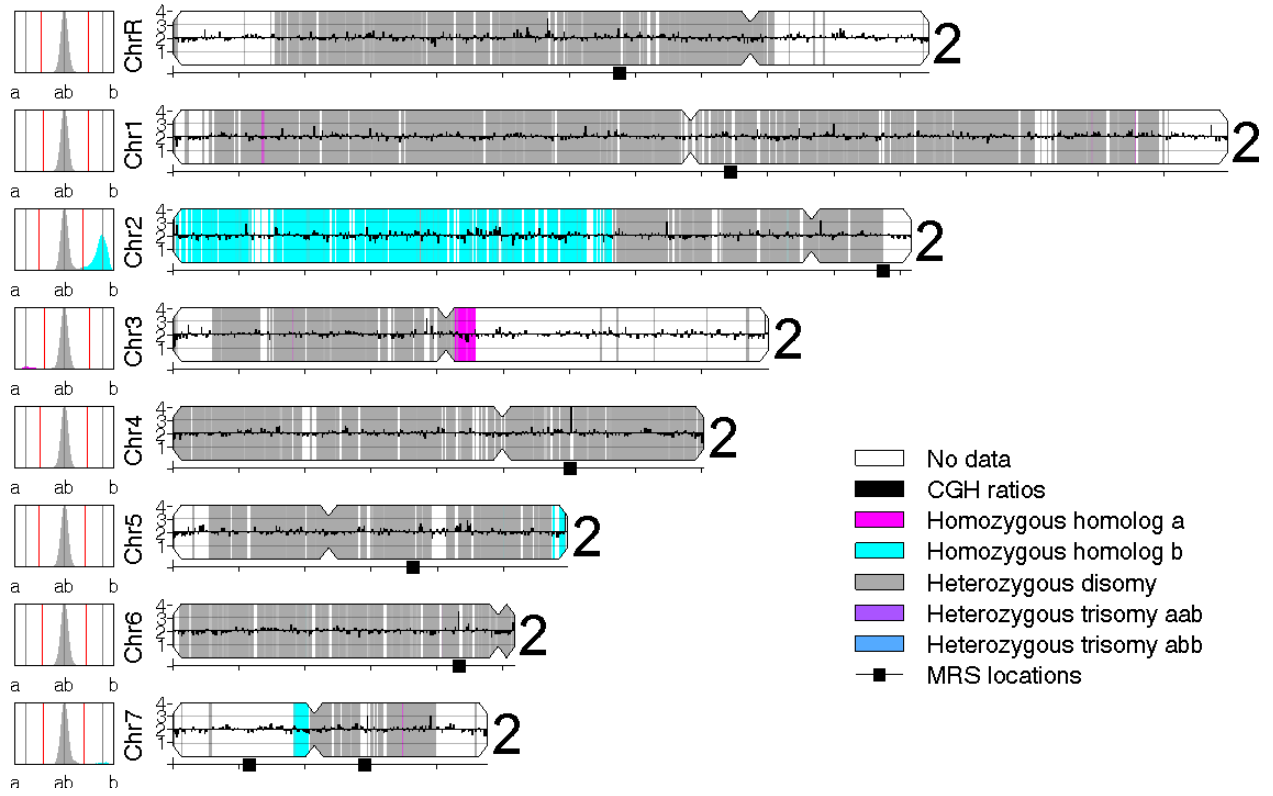

G

### BWP17 (YJB3731)

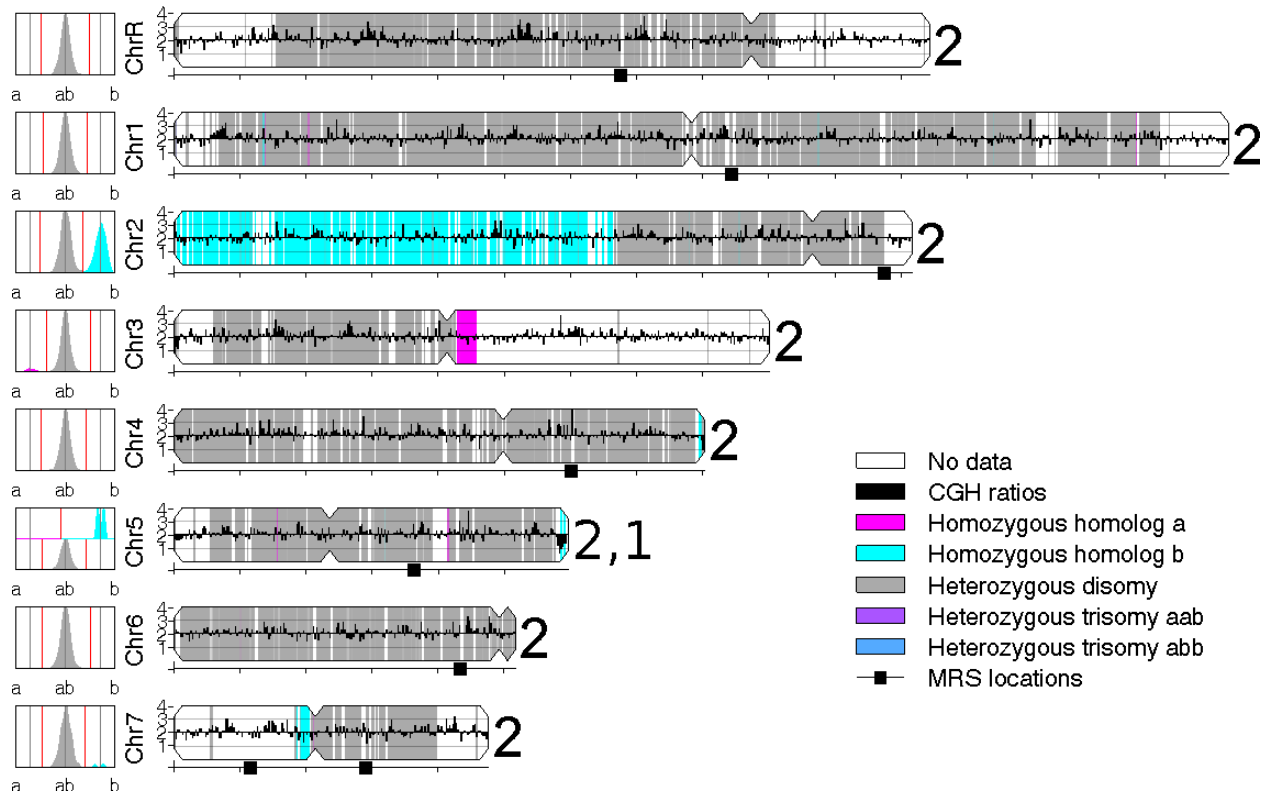

**Figure S2** SNP/CGH figures of related laboratory strains derived from SC5314. Data for each strain was analyzed by SNP/CGH array and visualized as illustrated in Fig. 3. A) CAF2 (YJB2101). B) RM10 (YJB8648). C) RM100 #13 (YJB8661). D) RM1000 #2 (YJB7617). E) RM1000 #6 (YJB7616). F) SN76 (YJB10038). G) BWP17 (YJB3731).
